# Supplementary material for: Solar-driven seawater desalinationviaplasmonic hybrid MOF/polymer and its antibacterial activity
Source: Royal Society of Chemistry journal article supplement (doi:10.1039/d3ra02242k), 2023-01-01
Supplement: d3ra02242k1.pdf [file d3ra02242k1.pdf]

## Solar-driven seawater desalination via plasmonic hybrid MOF/ polymer and its anti-bacterial activity.

Ola. R. Hayes, Amr Awad Ibrahim\*, Mina Shawky Adly, S. E. Samra, A. M. A. Ouf, S. A. El-Hakam, Awad I. Ahmed \*

*Chemistry Department, Faculty of Science, Mansoura University, Al-Mansoura 35516, Egypt.*

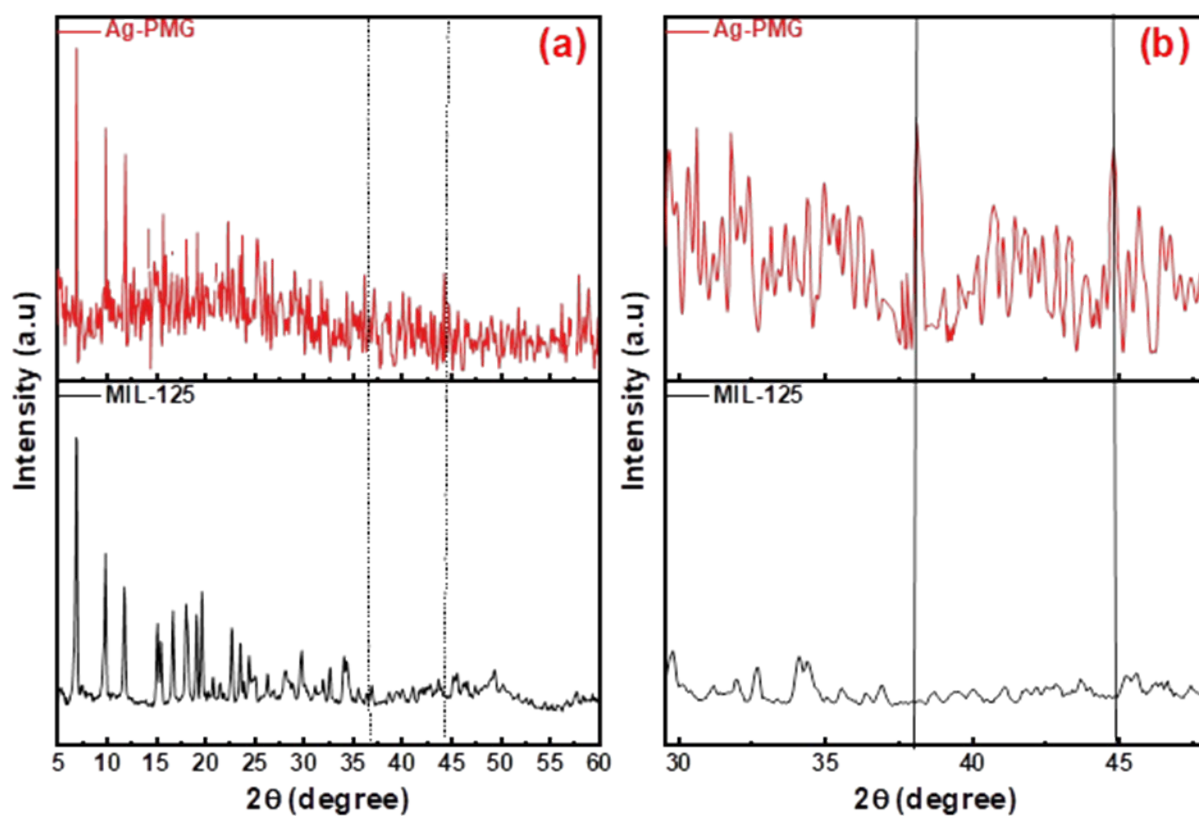

Fig. 1S. (a) XRD patterns of MIL-125 and modified MIL-125 and (b) XRD of Ag peak

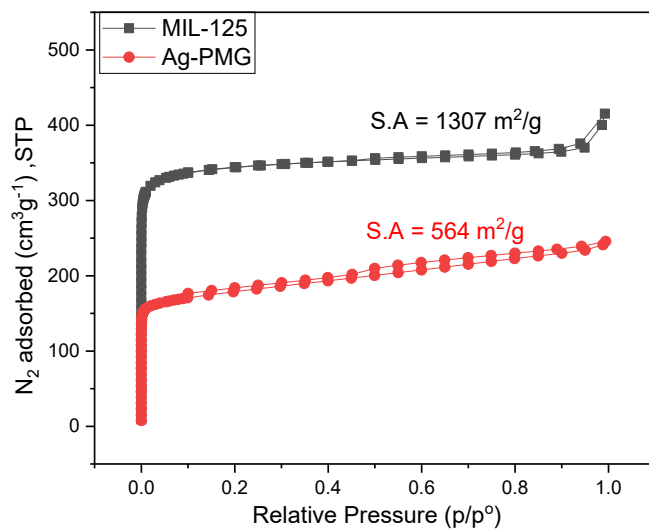

Fig. 2S. N<sub>2</sub> adsorption-desorption isotherms for MIL-125 and Ag-PMG
